# Supplementary material for: Host sirtuin 2 as an immunotherapeutic target against tuberculosis
Source: eLife. 2020 Jul 22;9:e55415. doi: 10.7554/eLife.55415 (PMC7398663; doi:10.7554/eLife.55415)
Supplement: Figure 1—source data 1. — Source data for Figure 1B, D–F, H, I, K, M, O, Q and R. [file elife-55415-fig1-data1.xlsx]

## Sheet: Sheet1
1B	Cnt	Actin	1.03288	1.13027	0.856584	t-test
		SIRT2	0.983957	1.05458	0.963707	0.00160807
	Infected	Actin	0.926588	1.10957	0.972655
		SIRT2	1.76541	1.98618	2.20381
1D	SIRT2										1F
U	1344	1125	1284	t-test							0h		48h
I	1937	1735	1874	0.00250538							Cnt	AGK2	Cnt	AGK2
											1.36667e+06	1.21667e+06	550000	63333.3
1E											3.83333e+06	2.06667e+06	1.43333e+06	200000
	0 h			24 h			48 h				6.43333e+06	5.06667e+06	1.38333e+06	423333
Cnt	57.9	61.2	58.4	72.8	67.2	77.6	54.3	47.7	66		t-test	0.590126	t-test	0.0428929
AGK2	52.5	52.2	54	39.16	41.6	37.04	22.2	21	26
t-test	0.00582731		t-test	0.000532878		t-test	0.00406689
				1I
1H				0h			48h
shCnt	sh3	sh5		sh-cnt	Sh-3	sh-5	sh-cnt	Sh-3	sh-5
58	29	27		713333	493333	550000	276667	63333.3	43333.3
58	28	27		980000	816667	723333	343333	56666.7	60000
57	32	22		543333	590000	543333	230000	23333.3	60000
t-test	2.33113e-05	4.49834e-05		t-test	0.519638	0.374131	t-test	0.00257623	0.00236064
1K
	Cnt			AGK2			t-test
Early	4.27	4.13	3.4	2.58	3.2	2.87	0.0315806
Late	1.56	1.69	1.59	1.3	1.44	1.79	0.531161
Necrosis	3.58	4.18	3.14	2.7	2.83	3.69	0.265361
1M
	Cnt			AGK2			t-test
Early	2.29	3.4	2.83	6.36	6.08	6.01	0.00060826
Late	2.18	2.42	2.26	8.32	7.79	8.59	1.71861e-05
Necrosis	8.04	5.71	6.06	3.85	4.21	4.43	0.0306196
1O
	U			UA			I			IA
MFI	2964	2825	2890	3167	3244	3159	3985	3893	3790	6178	6163	4787
			t-test	0.00358655					t-test	0.0172879
1Q
	Cnt			NAC			AGK2			Both
MFI	4455	4889	5001	4367	4268	4643	9479	9098	8779	7462	7219	6873
									t-test	0.00187017
1R
C	N	A	N+A
2000000	3800000	280000	1100000
2300000	4000000	320000	900000
3200000	3100000	450000	1300000
		t-test	0.00403939
