# Supplementary material for: Host sirtuin 2 as an immunotherapeutic target against tuberculosis
Source: eLife. 2020 Jul 22;9:e55415. doi: 10.7554/eLife.55415 (PMC7398663; doi:10.7554/eLife.55415)
Supplement: Figure 2—source data 1. — Source data for Figure 2B and D. [file elife-55415-fig2-data1.xlsx]

## Sheet: Sheet1
2D
	Cnt			AGK2			t-test
Uninf	16260	11548	18067	17815	15778	18430	0.38478
Info	20439	18554	20797	23882	24741	23895	0.00484815
2E
	Cnt			AGK2			t-test
Uninf	7021	8012	7077	9145	10293	9183	0.0118352
Info	13124	15006	15359	21402	18700	22317	0.00805958
