# Supplementary material for: Host sirtuin 2 as an immunotherapeutic target against tuberculosis
Source: eLife. 2020 Jul 22;9:e55415. doi: 10.7554/eLife.55415 (PMC7398663; doi:10.7554/eLife.55415)
Supplement: Figure 3—source data 1. — Source data for Figure 3A and B–E. [file elife-55415-fig3-data1.xlsx]

## Sheet: Sheet1
3A						3B			3C
ENSEMBL	Gene.name	U vs UA	U vs I	UA vs IA		1	Gene		ENSEMBL	Gene.name	U vs UA	U vs I	UA vs IA
ENSMUSG00000024116.5	NA	0	-6.10852	-4.5025		Antigen processing and presentation	4		ENSMUSG00000024610	Cd74	0	-1.04799	0
ENSMUSG00000039809.10	Gabbr2	0	-5.61471	-6.22882		Tuberculosis	4		ENSMUSG00000036594	H2-Aa	0	-1.37896	0
ENSMUSG00000038725.12	NA	0	-5.55459	-4.32193		Th1 and Th2 cell differentiation	3		ENSMUSG00000037548	H2-DMb2	0	-1.31762	0
ENSMUSG00000030737.17	Slco2b1	0	-5.49747	-5.61858		Th17 cell differentiation	3		ENSMUSG00000060586	H2-Eb1	0	-1.17227	0
ENSMUSG00000026090.16	2010300C02Rik	0	-5.12928	-4.06609		Phagosome	3		ENSMUSG00000024334	H2-Oa	0	0	5.24793
ENSMUSG00000079164.8	Tlr5	0	-5.04439	-5.04439		2	Gene		ENSMUSG00000016283	H2-M2	0	7.37678	7.91615
ENSMUSG00000004347.16	Pde1c	0	-4.90689	-2.91754		Cytokine-cytokine receptor interaction	9		ENSMUSG00000030745	Il21r	0	0	1.81669
ENSMUSG00000102418.1	Sh2d1b1	0	-4.56986	-5.18982		Th17 cell differentiation	5		ENSMUSG00000074695	Il22	0	0	4.47393
ENSMUSG00000061578.8	Ksr2	0	-4.37504	-3.71882		TNF signaling pathway	5		ENSMUSG00000035385	Ccl2	0	1.92766	2.76967
ENSMUSG00000071042.11	NA	0	-4.10713	-3.71799		3	Gene		ENSMUSG00000035373	Ccl7	0	2.05166	2.6652
ENSMUSG00000017309.11	Cd300lg	0	-4.08746	-4.02237		IL-17 signaling pathway	6		ENSMUSG00000029380	Cxcl1	0	3.20188	3.99548
ENSMUSG00000047592.17	Nxpe5	0	-4.06609	-3.10236		TNF signaling pathway	6		ENSMUSG00000029379	Cxcl3	0	6.42066	7.83352
ENSMUSG00000023039.16	NA	0	-3.90689	-2.97728		Cytokine-cytokine receptor interaction	5		ENSMUSG00000027399	Il1a	0	2.51655	3.30325
ENSMUSG00000022235.14	NA	0	-3.82543	-2.74193		Chemokine signaling pathway	4		ENSMUSG00000032487	Ptgs2	0	3.68436	4.64014
ENSMUSG00000051043.16	Gprc5c	0	-3.77052	-2.85371		NF-kappa B signaling pathway	3
ENSMUSG00000044206.3	Vsig4	0	-3.67054	-2.79874		4	Gene
ENSMUSG00000025150.10	Cbr2	0	-3.66985	-2.86129		PI3K-Akt signaling pathway	7
ENSMUSG00000043110.2	Lrrn4	0	-3.64386	-3.60534		6	Gene
ENSMUSG00000026012.2	Cd28	0	-3.53605	-2.02106		Cytosolic DNA-sensing pathway	4
ENSMUSG00000042985.7	Upk3b	0	-3.45943	-4.3147		Cytokine-cytokine receptor interaction	4
ENSMUSG00000038370.6	Pcp4l1	0	-3.45943	-3.1964		Toll-like receptor signaling pathway	3
ENSMUSG00000020658.9	NA	0	-3.35612	-2.86908		IL-17 signaling pathway	3
ENSMUSG00000045903.8	Npas4	0	-3.31079	-4.00899		TNF signaling pathway	3
ENSMUSG00000052353.13	Cemip	0	-3.2854	-2.7997		NF-kappa B signaling pathway	2
ENSMUSG00000031760.9	Mt3	0	-3.20945	-3.10434		Th17 cell differentiation	2
ENSMUSG00000031906.9	Smpd3	0	-3.09741	-3.09622		Tuberculosis	2
ENSMUSG00000049436.4	NA	0	-2.96782	-3.53916
ENSMUSG00000049103.13	NA	0	-2.95109	-2.63227
ENSMUSG00000015627.5	Gata5	0	-2.87101	-2.14048					3D							3E
ENSMUSG00000053559.12	NA	0	-2.86312	-2.95606					U vs I			UA vs IA				U vs I			UA vs IA
ENSMUSG00000037196.6	Pacrg	0	-2.85798	-2.47573				H2-Aa	0.68	0.73	0.75	1.6	2.3	2.1	GNG7	0.28	0.3	0.25	0.09	0.1	0.13
ENSMUSG00000078780.7	Gm5150	0	-2.79941	-2.36923				CD74	0.14	0.17	0.19	0.77	0.84	0.7	ITGA3	0.4	0.52	0.61	0.1	0.2	0.24
ENSMUSG00000029650.10	Slc46a3	0	-2.77074	-2.90319				IL22	0.56	0.61	0.63	1.29	1.62	1.51	STAT1	2.16	2.67	2.43	1.07	0.89	1.12
ENSMUSG00000106025.1	Gm42940	0	-2.68072	-1.8625				CD14	0.7	0.75	0.69	2.38	2.98	2.51	CREB5	8.79	9.45	9.11	1.34	1.67	1.42
ENSMUSG00000042476.12	Abcb4	0	-2.66297	-1.76033				CCL7	6.08	6.22	5.97	14.58	13.2	14.01	IL6	2.35	2.43	2.65	1.4	1.5	1.52
ENSMUSG00000031129.9	Slc9a9	0	-2.57531	-3.14684				CXCL1	0.1	0.2	0.23	1	0.8	1.23	ZBP1	2.16	1.72	1.98	0.57	0.52	0.5
ENSMUSG00000036587.13	Fut7	0	-2.46632	-2.4416							t-test	0.00361376						t-test	0.000838231
ENSMUSG00000009545.14	Kcnq1	0	-2.43942	-2.49596							t-test	0.000148978						t-test	0.0110158
ENSMUSG00000025330.6	Padi4	0	-2.42146	-4.39232							t-test	0.000919047						t-test	0.00102881
ENSMUSG00000055188.12	Rbm3os	0	-2.37828	-2.03525							t-test	0.000477941						t-test	3.73736e-06
ENSMUSG00000026357.3	Rgs18	0	-2.23491	-1.70251							t-test	4.27465e-05						t-test	0.00049437
ENSMUSG00000030683.11	Sez6l2	0	-2.22677	-2.89077							t-test	0.00306883						t-test	0.000388246
ENSMUSG00000037224.15	Zfyve28	0	-2.19794	-3.36457
ENSMUSG00000031167.16	Rbm3	0	-2.19182	-1.73845
ENSMUSG00000026580.16	Selp	0	-2.12199	-2.28011
ENSMUSG00000036905.8	C1qb	0	-2.09766	-1.85538
ENSMUSG00000036896.5	C1qc	0	-2.08384	-1.83872
ENSMUSG00000044734.15	NA	0	-2.05143	-1.4341
ENSMUSG00000041731.13	Pgm5	0	-2.00877	-2.04016
ENSMUSG00000036526.8	Card11	0	-1.97639	-2.6495
ENSMUSG00000049744.15	Arhgap15	0	-1.96438	-1.84891
ENSMUSG00000004933.17	Matk	0	-1.94689	-2.18725
ENSMUSG00000021384.14	Susd3	0	-1.93634	-1.20667
ENSMUSG00000064373.11	NA	0	-1.88306	-2.07839
ENSMUSG00000024451.8	Arap3	0	-1.87987	-1.97784
ENSMUSG00000092741.2	Mir3074-1	0	-1.86394	-2.24793
ENSMUSG00000026579.8	F5	0	-1.83432	-1.87941
ENSMUSG00000032554.15	Trf	0	-1.83335	-1.65896
ENSMUSG00000106825.1	2510016D11Rik	0	-1.81425	-1.92036
ENSMUSG00000025993.10	Slc40a1	0	-1.81003	-2.14244
ENSMUSG00000045322.10	Tlr9	0	-1.80735	-2.38466
ENSMUSG00000030774.13	Pak1	0	-1.79961	-1.07496
ENSMUSG00000028927.6	Padi2	0	-1.78588	-1.74514
ENSMUSG00000049709.4	Nlrp10	0	-1.7625	-3.25376
ENSMUSG00000020681.14	Ace	0	-1.74723	-2.16099
ENSMUSG00000015854.7	Cd5l	0	-1.7413	-1.72054
ENSMUSG00000096606.2	Tpbgl	0	-1.73697	-1.45017
ENSMUSG00000093677.1	Gm20712	0	-1.71128	-2.51706
ENSMUSG00000074570.13	NA	0	-1.70555	-2.34169
ENSMUSG00000050106.17	Tmc8	0	-1.69531	-1.99354
ENSMUSG00000033207.6	Mamdc2	0	-1.69449	-1.85477
ENSMUSG00000002985.16	Apoe	0	-1.66435	-1.63431
ENSMUSG00000106702.1	Gm42846	0	-1.64145	-1.73207
ENSMUSG00000041633.14	Kctd12b	0	-1.62539	-1.64111
ENSMUSG00000024663.17	Rab3il1	0	-1.60245	-1.57269
ENSMUSG00000085586.1	Gm11613	0	-1.59296	-1.51062
ENSMUSG00000042851.17	Zc3h6	0	-1.59282	-1.4267
ENSMUSG00000029919.5	Hpgds	0	-1.58687	-1.62958
ENSMUSG00000035403.10	Crb2	0	-1.5787	-1.5979
ENSMUSG00000069607.4	Cd300ld3	0	-1.54934	-1.53112
ENSMUSG00000004552.16	Ctse	0	-1.53434	-1.77831
ENSMUSG00000002409.18	Dyrk1b	0	-1.53299	-1.43693
ENSMUSG00000064043.13	Trerf1	0	-1.5302	-1.8217
ENSMUSG00000000318.16	Clec10a	0	-1.50815	-2.39023
ENSMUSG00000061046.9	Haghl	0	-1.50069	-1.52713
ENSMUSG00000056091.12	St3gal5	0	-1.4923	-1.46306
ENSMUSG00000095788.6	Sirpb1a	0	-1.48829	-2.17425
ENSMUSG00000003420.8	Fcgrt	0	-1.48474	-1.11303
ENSMUSG00000037185.8	NA	0	-1.48382	-1.25298
ENSMUSG00000037235.13	Mxd4	0	-1.4653	-1.2624
ENSMUSG00000029204.7	Rhoh	0	-1.45705	-1.47063
ENSMUSG00000100280.2	Gm28417	0	-1.44703	-1.51774
ENSMUSG00000032122.14	NA	0	-1.44076	-1.60228
ENSMUSG00000031445.5	Proz	0	-1.43577	-1.17137
ENSMUSG00000036452.17	Arhgap26	0	-1.43481	-1.30812
ENSMUSG00000036887.5	C1qa	0	-1.4317	-1.03214
ENSMUSG00000032377.8	Plscr4	0	-1.43027	-1.3011
ENSMUSG00000085023.1	Gm12744	0	-1.42936	-1.07266
ENSMUSG00000026126.15	Ptpn18	0	-1.42693	-1.41675
ENSMUSG00000026365.15	Cfh	0	-1.42676	-1.45316
ENSMUSG00000021579.4	Lrrc14b	0	-1.41587	-1.98448
ENSMUSG00000032741.9	Tpcn1	0	-1.41429	-1.49664
ENSMUSG00000049130.6	C5ar1	0	-1.40058	-1.05406
ENSMUSG00000019302.16	Atp6v0a1	0	-1.3931	-1.3239
ENSMUSG00000039474.13	Wfs1	0	-1.39091	-0.953056
ENSMUSG00000018819.10	Lsp1	0	-1.3834	-1.73286
ENSMUSG00000034926.3	Dhcr24	0	-1.38307	-0.895274
ENSMUSG00000042724.7	NA	0	-1.3793	-1.11011
ENSMUSG00000037337.11	Map4k1	0	-1.37017	-1.04592
ENSMUSG00000048200.12	Cracr2b	0	-1.36766	-1.35529
ENSMUSG00000017697.3	Ada	0	-1.36274	-1.30248
ENSMUSG00000021263.10	NA	0	-1.35853	-1.59995
ENSMUSG00000029804.16	NA	0	-1.35755	-1.20067
ENSMUSG00000021262.14	NA	0	-1.35229	-1.53794
ENSMUSG00000022679.13	Mpv17l	0	-1.3505	-1.2076
ENSMUSG00000102191.1	Gm36569	0	-1.34652	-1.55444
ENSMUSG00000026483.13	Fam129a	0	-1.32691	-1.55979
ENSMUSG00000034041.4	Lyl1	0	-1.29572	-1.40922
ENSMUSG00000022265.6	NA	0	-1.29522	-1.14481
ENSMUSG00000045193.13	Cirbp	0	-1.29177	-1.33133
ENSMUSG00000016494.9	Cd34	0	-1.28011	-1.31342
ENSMUSG00000030223.14	Ptpro	0	-1.27804	-1.16832
ENSMUSG00000054733.9	Msra	0	-1.27409	-0.988422
ENSMUSG00000027843.13	Ptpn22	0	-1.26748	-1.3359
ENSMUSG00000031391.18	L1cam	0	-1.26229	-1.55304
ENSMUSG00000052403.11	Fcnaos	0	-1.23419	-1.05658
ENSMUSG00000085560.2	C230038L03Rik	0	-1.2258	-1.02405
ENSMUSG00000038776.13	Ephx1	0	-1.22017	-1.23343
ENSMUSG00000030657.11	Xylt1	0	-1.20873	-1.53319
ENSMUSG00000038332.12	NA	0	-1.20668	-1.45453
ENSMUSG00000002944.15	Cd36	0	-1.20295	-1.27998
ENSMUSG00000027381.16	Bcl2l11	0	-1.19618	-1.31975
ENSMUSG00000030047.14	Arhgap25	0	-1.1923	-1.28373
ENSMUSG00000062980.15	Cped1	0	-1.19162	-1.52825
ENSMUSG00000020034.7	Tcp11l2	0	-1.1915	-1.51311
ENSMUSG00000022102.13	Dok2	0	-1.19101	-1.24445
ENSMUSG00000026360.9	Rgs2	0	-1.18646	-1.16087
ENSMUSG00000039450.11	Dcxr	0	-1.18511	-1.06828
ENSMUSG00000030208.15	Emp1	0	-1.18017	-1.1259
ENSMUSG00000033147.16	Slc22a15	0	-1.17688	-1.07097
ENSMUSG00000027961.7	Lrrc39	0	-1.17109	-1.5536
ENSMUSG00000039652.16	Cpeb3	0	-1.16616	-1.26973
ENSMUSG00000053687.14	NA	0	-1.16162	-1.14191
ENSMUSG00000027955.16	Fam198b	0	-1.1586	-1.11086
ENSMUSG00000028456.18	Unc13b	0	-1.15528	-1.43639
ENSMUSG00000027544.16	Nfatc2	0	-1.15222	-1.27789
ENSMUSG00000052160.6	NA	0	-1.15023	-1.19652
ENSMUSG00000020053.18	Igf1	0	-1.14523	-1.31606
ENSMUSG00000021947.10	NA	0	-1.1382	-0.921167
ENSMUSG00000034265.7	NA	0	-1.13667	-1.24994
ENSMUSG00000005142.10	Man2b1	0	-1.12487	-1.28691
ENSMUSG00000073418.4	C4b	0	-1.12191	-1.37435
ENSMUSG00000055639.16	Dach1	0	-1.11694	-1.25731
ENSMUSG00000031295.13	Phka2	0	-1.11278	-1.17918
ENSMUSG00000041552.7	Ptchd1	0	-1.10818	-1.16993
ENSMUSG00000026576.12	Atp1b1	0	-1.10392	-1.42146
ENSMUSG00000034858.15	NA	0	-1.09011	-0.994264
ENSMUSG00000037907.16	Ankrd13b	0	-1.08366	-1.15129
ENSMUSG00000044456.16	Rin3	0	-1.08028	-1.07485
ENSMUSG00000030096.8	Slc6a6	0	-1.07965	-1.20242
ENSMUSG00000059013.12	Sh2d3c	0	-1.073	-1.30773
ENSMUSG00000040093.15	Bmf	0	-1.07257	-1.44144
ENSMUSG00000013089.15	Etv5	0	-1.06202	-1.10714
ENSMUSG00000032089.16	Il10ra	0	-1.0613	-1.07891
ENSMUSG00000029570.5	Lfng	0	-1.06113	-0.968464
ENSMUSG00000039206.13	Daglb	0	-1.05224	-1.11772
ENSMUSG00000032589.14	Bsn	0	-1.04492	-1.18863
ENSMUSG00000001552.14	Jup	0	-1.04452	-1.05059
ENSMUSG00000006395.16	Hyi	0	-1.04374	-1.0422
ENSMUSG00000001025.8	S100a6	0	-1.03958	-0.92264
ENSMUSG00000023044.1	NA	0	-1.03726	-1.08204
ENSMUSG00000026321.7	Tnfrsf11a	0	-1.03667	-0.995028
ENSMUSG00000019874.11	Fabp7	0	-1.03469	-1.43992
ENSMUSG00000021624.9	Cd180	0	-1.03358	-1.29015
ENSMUSG00000038178.16	Slc43a2	0	-1.02108	-0.915998
ENSMUSG00000025509.15	Pnpla2	0	-1.01965	-1.12613
ENSMUSG00000027293.13	Ehd4	0	-1.01814	-1.11504
ENSMUSG00000048078.16	Tenm4	0	-1.01596	-1.27037
ENSMUSG00000073678.4	Pgap1	0	-1.01371	-1.27191
ENSMUSG00000026879.14	Gsn	0	-1.01206	-1.10489
ENSMUSG00000025810.9	Nrp1	0	-1.0109	-0.982039
ENSMUSG00000049313.8	Sorl1	0	-1.0058	-1.21508
ENSMUSG00000039031.15	NA	0	-1.00545	-1.08484
ENSMUSG00000024975.12	Pdcd4	0	-1.00478	-1.01277
ENSMUSG00000033685.13	Ucp2	0	-1.0017	-0.975714
ENSMUSG00000026437.11	Cdk18	0	-0.996709	-0.928317
ENSMUSG00000038855.10	Itpkb	0	-0.995953	-1.01032
ENSMUSG00000033857.12	Engase	0	-0.987687	-1.1103
ENSMUSG00000042622.13	NA	0	1.00479	1.55105
ENSMUSG00000096957.1	E230013L22Rik	0	1.04081	1.51
ENSMUSG00000086347.1	Gm11626	0	1.04182	1.49698
ENSMUSG00000018796.13	Acsl1	0	1.04726	1.29958
ENSMUSG00000036661.13	NA	0	1.07378	1.65772
ENSMUSG00000052776.10	Oas1a	0	1.07566	1.27753
ENSMUSG00000036478.7	NA	0	1.07797	1.28224
ENSMUSG00000027660.16	Skil	0	1.07851	1.11415
ENSMUSG00000033538.13	Casp4	0	1.08205	1.19841
ENSMUSG00000024912.5	Fosl1	0	1.08684	1.45251
ENSMUSG00000044716.12	Dok7	0	1.08931	1.08983
ENSMUSG00000031504.6	Rab20	0	1.08964	1.471
ENSMUSG00000025225.14	Nfkb2	0	1.0921	1.41349
ENSMUSG00000053931.11	Cnn3	0	1.10347	1.22124
ENSMUSG00000024672.11	Ms4a7	0	1.1048	1.59429
ENSMUSG00000039395.8	Mreg	0	1.10495	1.27185
ENSMUSG00000024679.10	Ms4a6d	0	1.10913	1.23646
ENSMUSG00000028583.14	Pdpn	0	1.11918	1.40576
ENSMUSG00000031429.14	Psmd10	0	1.12055	1.38734
ENSMUSG00000024308.14	NA	0	1.12737	1.16928
ENSMUSG00000041957.15	Pkp2	0	1.12953	1.57126
ENSMUSG00000019916.14	P4ha1	0	1.13962	1.27815
ENSMUSG00000001123.15	Lgals9	0	1.14701	1.35525
ENSMUSG00000043336.14	Filip1l	0	1.1563	1.72159
ENSMUSG00000029490.3	Mfsd7a	0	1.15684	1.39408
ENSMUSG00000055172.10	C1ra	0	1.1582	1.0852
ENSMUSG00000029822.15	Osbpl3	0	1.16046	1.28835
ENSMUSG00000066152.11	Slc31a2	0	1.16248	1.28336
ENSMUSG00000014786.8	Slc9a5	0	1.16439	1.38773
ENSMUSG00000019929.15	NA	0	1.16681	1.63914
ENSMUSG00000016496.7	Cd274	0	1.16954	1.1454
ENSMUSG00000028613.14	Lrp8	0	1.17769	1.28273
ENSMUSG00000036528.15	Ppfibp2	0	1.18364	1.60993
ENSMUSG00000032000.17	Birc3	0	1.18763	1.24568
ENSMUSG00000015243.4	Abca1	0	1.19882	1.24809
ENSMUSG00000010358.13	Ifi35	0	1.20604	1.36586
ENSMUSG00000039960.5	Rhou	0	1.20926	1.17641
ENSMUSG00000027074.14	Slc43a3	0	1.21032	1.30503
ENSMUSG00000101438.1	NA	0	1.21592	1.14972
ENSMUSG00000028597.11	Gpx7	0	1.21736	1.35892
ENSMUSG00000023951.16	NA	0	1.22102	1.44397
ENSMUSG00000021322.7	NA	0	1.22239	1.36667
ENSMUSG00000023232.17	Serinc2	0	1.22973	1.48448
ENSMUSG00000022587.14	Ly6e	0	1.22986	1.14069
ENSMUSG00000019256.17	Ahr	0	1.23336	1.40195
ENSMUSG00000017830.15	Dhx58	0	1.23757	1.41292
ENSMUSG00000020844.6	Nxn	0	1.24876	1.28861
ENSMUSG00000072620.3	Slfn2	0	1.2508	1.61415
ENSMUSG00000078920.2	NA	0	1.25225	1.31451
ENSMUSG00000092609.1	Gm20481	0	1.27612	1.54489
ENSMUSG00000091649.3	Phf11b	0	1.28202	1.17824
ENSMUSG00000040152.8	Thbs1	0	1.29092	1.16941
ENSMUSG00000034422.14	Parp14	0	1.29983	1.13533
ENSMUSG00000053137.6	NA	0	1.30189	1.67929
ENSMUSG00000028076.12	Cd1d1	0	1.31171	1.37672
ENSMUSG00000073489.5	NA	0	1.31497	1.23268
ENSMUSG00000027848.12	Olfml3	0	1.31714	1.6456
ENSMUSG00000073409.12	H2-Q6	0	1.31871	1.43538
ENSMUSG00000032997.16	Chpf	0	1.31982	1.29674
ENSMUSG00000009376.15	Met	0	1.33055	1.54511
ENSMUSG00000041481.16	Serpina3g	0	1.3425	1.29924
ENSMUSG00000031304.18	Il2rg	0	1.34846	1.34022
ENSMUSG00000037820.15	Tgm2	0	1.34975	1.41944
ENSMUSG00000029605.16	Oas1b	0	1.35435	1.45943
ENSMUSG00000035164.7	NA	0	1.35635	1.51101
ENSMUSG00000092283.1	Gm20412	0	1.36689	1.41647
ENSMUSG00000028270.12	Gbp2	0	1.36897	1.65547
ENSMUSG00000028602.12	Tnfrsf8	0	1.37346	1.7346
ENSMUSG00000041827.15	Oasl1	0	1.37624	1.33957
ENSMUSG00000000957.9	NA	0	1.37685	1.67726
ENSMUSG00000070436.12	Serpinh1	0	1.39145	1.52989
ENSMUSG00000014776.7	Nol3	0	1.39593	1.55681
ENSMUSG00000002980.14	Bcam	0	1.39722	1.44294
ENSMUSG00000025492.6	Ifitm3	0	1.39978	1.17036
ENSMUSG00000019970.15	Sgk1	0	1.39989	1.38756
ENSMUSG00000002983.17	Relb	0	1.40303	1.68457
ENSMUSG00000074813.12	NA	0	1.41213	1.62532
ENSMUSG00000066363.12	Serpina3f	0	1.41504	1.73039
ENSMUSG00000078853.8	Igtp	0	1.42999	1.18442
ENSMUSG00000027737.10	Slc7a11	0	1.44167	1.972
ENSMUSG00000022357.2	Klhl38	0	1.44508	1.80006
ENSMUSG00000015340.10	Cybb	0	1.46142	1.5827
ENSMUSG00000038037.4	NA	0	1.46173	2.21864
ENSMUSG00000086712.2	AI427809	0	1.46467	1.45286
ENSMUSG00000004730.14	NA	0	1.47076	1.66564
ENSMUSG00000040264.10	Gbp2b	0	1.47468	1.57223
ENSMUSG00000048826.6	NA	0	1.47883	1.37197
ENSMUSG00000018906.14	P4ha2	0	1.49835	1.58728
ENSMUSG00000068245.14	Phf11d	0	1.50285	1.71194
ENSMUSG00000040026.8	Saa3	0	1.50651	1.74238
ENSMUSG00000028527.18	Ak4	0	1.5113	1.51252
ENSMUSG00000040296.15	Ddx58	0	1.52901	1.54269
ENSMUSG00000018927.3	Ccl6	0	1.53386	1.76127
ENSMUSG00000101389.1	Ms4a4a	0	1.54057	1.51847
ENSMUSG00000017002.14	Slpi	0	1.54073	1.88851
ENSMUSG00000037405.7	NA	0	1.54521	1.75891
ENSMUSG00000023947.7	NA	0	1.5553	1.87755
ENSMUSG00000022037.14	NA	0	1.55672	1.78366
ENSMUSG00000040253.15	Gbp7	0	1.56363	1.4097
ENSMUSG00000021298.7	NA	0	1.56832	1.73926
ENSMUSG00000047945.6	Marcksl1	0	1.56884	1.92981
ENSMUSG00000032374.14	Plod2	0	1.57947	1.60523
ENSMUSG00000026829.9	Gbgt1	0	1.58991	1.58496
ENSMUSG00000099757.1	BE692007	0	1.59979	1.65183
ENSMUSG00000036136.8	NA	0	1.60934	2.01978
ENSMUSG00000098871.1	Mir6381	0	1.62094	1.66513
ENSMUSG00000057135.12	Scimp	0	1.62396	1.81421
ENSMUSG00000024892.15	NA	0	1.64186	1.32787
ENSMUSG00000028776.14	Tinagl1	0	1.65803	1.46647
ENSMUSG00000097134.1	NA	0	1.67436	1.89691
ENSMUSG00000036995.7	Asap3	0	1.6789	1.72394
ENSMUSG00000039146.5	Ifi44l	0	1.69969	1.71194
ENSMUSG00000028885.8	Smpdl3b	0	1.71195	1.79508
ENSMUSG00000032380.8	Dapk2	0	1.73697	2.00514
ENSMUSG00000004098.7	Col5a3	0	1.73823	2.28065
ENSMUSG00000066861.14	Oas1g	0	1.74299	1.75459
ENSMUSG00000079419.4	Ms4a6c	0	1.74487	1.6399
ENSMUSG00000000386.14	NA	0	1.75437	2.01342
ENSMUSG00000001348.14	NA	0	1.75477	1.96974
ENSMUSG00000040483.15	Xaf1	0	1.76321	1.81823
ENSMUSG00000030268.17	Bcat1	0	1.7641	2.1789
ENSMUSG00000090877.3	Hspa1b	0	1.76626	2.55714
ENSMUSG00000078616.2	Trim30c	0	1.77529	2.94753
ENSMUSG00000032690.16	Oas2	0	1.78308	1.56281
ENSMUSG00000064246.10	Chil1	0	1.79909	2.12579
ENSMUSG00000034248.7	Slc25a37	0	1.80376	1.32877
ENSMUSG00000022534.13	NA	0	1.81229	2.05019
ENSMUSG00000031530.6	Dusp4	0	1.81803	1.78227
ENSMUSG00000030717.9	Nupr1	0	1.81943	1.74432
ENSMUSG00000029561.17	Oasl2	0	1.8677	1.79721
ENSMUSG00000020325.10	Fstl3	0	1.86942	2.09245
ENSMUSG00000051048.17	P4ha3	0	1.87699	1.98423
ENSMUSG00000020641.15	NA	0	1.88523	1.68864
ENSMUSG00000035678.7	NA	0	1.89947	2.66558
ENSMUSG00000054855.13	Rnd1	0	1.90112	2.3114
ENSMUSG00000037126.15	NA	0	1.9053	2.18682
ENSMUSG00000020178.5	NA	0	1.91797	2.05816
ENSMUSG00000040624.17	Plekhg1	0	1.92172	1.81164
ENSMUSG00000024401.14	Tnf	0	1.9347	2.07981
ENSMUSG00000086196.7	Gm13571	0	1.96125	1.79159
ENSMUSG00000099974.1	Bcl2a1d	0	1.96164	2.33926
ENSMUSG00000082292.3	Gm12250	0	1.96481	2.09137
ENSMUSG00000024164.15	C3	0	1.97191	1.72112
ENSMUSG00000056145.5	AI504432	0	1.9823	2.45317
ENSMUSG00000020638.7	NA	0	1.98492	1.94055
ENSMUSG00000018920.11	Cxcl16	0	1.99169	2.11579
ENSMUSG00000003617.16	Cp	0	1.99178	2.00998
ENSMUSG00000020027.18	Socs2	0	1.99498	1.99284
ENSMUSG00000039934.12	Gsap	0	2.0035	2.13542
ENSMUSG00000040829.14	Zmynd15	0	2.0177	2.22907
ENSMUSG00000038527.9	C1rl	0	2.03924	1.77193
ENSMUSG00000037989.15	Wnk2	0	2.0607	2.50611
ENSMUSG00000028037.13	Ifi44	0	2.07112	1.89249
ENSMUSG00000038400.15	Pmepa1	0	2.08276	2.36544
ENSMUSG00000045664.4	Cdc42ep2	0	2.11457	2.37819
ENSMUSG00000013974.3	Mcemp1	0	2.1164	2.01757
ENSMUSG00000021125.6	Arg2	0	2.1979	2.40965
ENSMUSG00000107736.1	Gm44148	0	2.22641	2.01767
ENSMUSG00000027347.18	Rasgrp1	0	2.27085	2.67243
ENSMUSG00000028268.14	Gbp3	0	2.27645	2.21109
ENSMUSG00000062488.9	Ifit3b	0	2.28889	2.65208
ENSMUSG00000030109.15	Slc6a12	0	2.29408	2.46292
ENSMUSG00000037411.10	Serpine1	0	2.29737	2.57779
ENSMUSG00000030107.10	Usp18	0	2.3261	2.21022
ENSMUSG00000021990.15	Spata13	0	2.34169	2.53504
ENSMUSG00000031239.5	Itm2a	0	2.4021	1.88136
ENSMUSG00000105096.1	Gbp10	0	2.41028	2.63941
ENSMUSG00000029084.5	Cd38	0	2.41191	2.81558
ENSMUSG00000045932.12	Ifit2	0	2.4321	1.83552
ENSMUSG00000075010.4	AW112010	0	2.4363	2.78727
ENSMUSG00000022018.7	Rgcc	0	2.45519	2.40718
ENSMUSG00000028214.13	Gem	0	2.51927	2.72463
ENSMUSG00000017652.16	Cd40	0	2.57808	2.71242
ENSMUSG00000046718.8	Bst2	0	2.5822	2.70134
ENSMUSG00000024529.13	Lox	0	2.59479	2.61609
ENSMUSG00000026821.15	Ralgds	0	2.632	3.16004
ENSMUSG00000000204.15	NA(not available)	0	2.65099	1.83229
ENSMUSG00000106478.1	Gm36551	0	2.73697	2.98793
ENSMUSG00000023341.14	NA	0	2.76282	3.35634
ENSMUSG00000079414.2	NA	0	2.7633	2.34169
ENSMUSG00000031825.16	Crispld2	0	2.80735	5.08746
ENSMUSG00000016024.9	Lbp	0	2.81816	2.9386
ENSMUSG00000035692.6	Isg15	0	2.82443	3.02291
ENSMUSG00000087135.7	Gm16096	0	2.86095	3.13498
ENSMUSG00000032561.14	NA	0	2.88042	3.92547
ENSMUSG00000043613.7	NA	0	2.88811	2.931
ENSMUSG00000034394.14	Lif	0	2.89907	2.73025
ENSMUSG00000032024.10	Clmp	0	2.90202	3.07472
ENSMUSG00000041347.5	Bdkrb1	0	2.94429	2.89021
ENSMUSG00000024675.19	Ms4a4c	0	2.9642	2.72048
ENSMUSG00000078763.2	Slfn1	0	2.97689	2.47365
ENSMUSG00000027995.10	Tlr2	0	2.97909	3.38108
ENSMUSG00000006342.14	NA	0	2.98132	2.94676
ENSMUSG00000034459.8	Ifit1	0	3.11085	3.10487
ENSMUSG00000076441.9	Ass1	0	3.11464	3.29869
ENSMUSG00000079363.7	Gbp4	0	3.13516	2.75002
ENSMUSG00000105504.4	Gbp5	0	3.15325	2.52166
ENSMUSG00000038963.15	Slco4a1	0	3.15895	3.81449
ENSMUSG00000074896.3	Ifit3	0	3.173	2.68399
ENSMUSG00000067297.4	Ifit1bl2	0	3.3505	2.88264
ENSMUSG00000005824.6	NA	0	3.37851	2.92057
ENSMUSG00000024810.16	Il33	0	3.41143	3.74339
ENSMUSG00000029371.7	Cxcl5	0	3.42839	3.98489
ENSMUSG00000029377.5	Ereg	0	3.46713	3.87685
ENSMUSG00000044258.9	NA	0	3.59904	2.80735
ENSMUSG00000049511.5	Htr1b	0	3.61471	3.79256
ENSMUSG00000031626.17	Sorbs2	0	3.62599	3.76407
ENSMUSG00000050370.4	Ch25h	0	3.77961	3.98351
ENSMUSG00000057346.11	NA	0	3.86129	2.822
ENSMUSG00000020407.13	Upp1	0	4.02554	4.05889
ENSMUSG00000068246.5	NA	0	4.26946	3.57289
ENSMUSG00000008658.15	NA	0	4.2854	4.83289
ENSMUSG00000030162.14	Olr1	0	4.32793	4.92481
ENSMUSG00000038067.2	Csf3	0	4.73697	4.09398
ENSMUSG00000022586.11	Ly6i	0	4.73697	4.70044
ENSMUSG00000097558.1	Gm26902	0	4.79008	5.93074
ENSMUSG00000030142.10	Clec4e	0	4.84572	5.3682
ENSMUSG00000063234.4	NA	0	5.05683	4.54844
ENSMUSG00000041324.13	NA	0	5.12928	4.8276
ENSMUSG00000058427.10	Cxcl2	0	5.20275	5.62374
ENSMUSG00000022044.14	Stmn4	0	6.38082	5.2854
ENSMUSG00000097466.8	D430036J16Rik	0	6.38082	6.1964
ENSMUSG00000022126.6	Acod1	0	6.41407	6.45732
ENSMUSG00000097754.1	Ptgs2os2	0	6.90689	4.61471
ENSMUSG00000020826.7	NA	0	6.90689	7.38082
ENSMUSG00000020010.7	Vnn3	0	8.63178	6.24793
ENSMUSG00000041559	Fmod	0	-6.06609	0
ENSMUSG00000042757	NA	0	-5.14975	0
ENSMUSG00000035165	Kcne3	0	-4.9542	0
ENSMUSG00000056508	NA	0	-4.58496	0
ENSMUSG00000031517	Gpm6a	0	-3.79008	0
ENSMUSG00000097819	Gm26813	0	-3.70044	0
ENSMUSG00000040703	Cyp2s1	0	-3.62449	0
ENSMUSG00000021071	NA	0	-3.5502	0
ENSMUSG00000099875	Rbm3-ps	0	-3.49185	0
ENSMUSG00000056025	Clca3a1	0	-3.34577	0
ENSMUSG00000104467	Gm37660	0	-3.24793	0
ENSMUSG00000044229	NA	0	-3.20945	0
ENSMUSG00000022103	NA	0	-3.16993	0
ENSMUSG00000028989	Angptl7	0	-3.1375	0
ENSMUSG00000091345	NA	0	-3.10434	0
ENSMUSG00000044749	Abca6	0	-2.974	0
ENSMUSG00000008845	Cd163	0	-2.96963	0
ENSMUSG00000004633	Chn2	0	-2.52356	0
ENSMUSG00000026581	Sell	0	-2.48543	0
ENSMUSG00000026649	Cfap126	0	-2.45943	0
ENSMUSG00000023043	NA	0	-2.43296	0
ENSMUSG00000070407	Hs3st3b1	0	-2.32193	0
ENSMUSG00000037922	Bank1	0	-2.27302	0
ENSMUSG00000052336	NA	0	-2.25919	0
ENSMUSG00000057337	Chst3	0	-2.12776	0
ENSMUSG00000033910	Gucy1a1	0	-2.12029	0
ENSMUSG00000025780	Itih5	0	-2.10692	0
ENSMUSG00000078122	F630028O10Rik	0	-2.09622	0
ENSMUSG00000039601	NA	0	-2.08017	0
ENSMUSG00000053279	NA	0	-2.0199	0
ENSMUSG00000079445	B3gnt7	0	-2	0
ENSMUSG00000035459	NA	0	-1.9386	0
ENSMUSG00000105135	Gm43667	0	-1.93643	0
ENSMUSG00000000202	Btbd17	0	-1.91754	0
ENSMUSG00000012123	NA	0	-1.9023	0
ENSMUSG00000029602	Rasal1	0	-1.848	0
ENSMUSG00000026303	Mlph	0	-1.8365	0
ENSMUSG00000044033	Ccdc141	0	-1.73335	0
ENSMUSG00000019124	Scrn1	0	-1.6939	0
ENSMUSG00000021806	NA	0	-1.69322	0
ENSMUSG00000026548	Slamf9	0	-1.57878	0
ENSMUSG00000103367	Gm38158	0	-1.57469	0
ENSMUSG00000030117	Gdf3	0	-1.53504	0
ENSMUSG00000054871	NA	0	-1.48317	0
ENSMUSG00000025085	Ablim1	0	-1.47947	0
ENSMUSG00000097062	Gm17586	0	-1.43874	0
ENSMUSG00000036617	Etl4	0	-1.39855	0
ENSMUSG00000036594	H2-Aa	0	-1.37896	0
ENSMUSG00000084932	Gm15156	0	-1.37851	0
ENSMUSG00000015647	Lama5	0	-1.35835	0
ENSMUSG00000037548	H2-DMb2	0	-1.31762	0
ENSMUSG00000075514	Gm13375	0	-1.29123	0
ENSMUSG00000048142	Nat8l	0	-1.28605	0
ENSMUSG00000003379	Cd79a	0	-1.28293	0
ENSMUSG00000032702	Kank1	0	-1.27938	0
ENSMUSG00000026938	Fcna	0	-1.27014	0
ENSMUSG00000039246	Lyplal1	0	-1.23769	0
ENSMUSG00000023908	NA	0	-1.18858	0
ENSMUSG00000006611	NA	0	-1.18418	0
ENSMUSG00000058258	Idi1	0	-1.1765	0
ENSMUSG00000026077	Npas2	0	-1.17509	0
ENSMUSG00000060586	H2-Eb1	0	-1.17227	0
ENSMUSG00000041762	Gpr155	0	-1.13352	0
ENSMUSG00000026807	Ak8	0	-1.13245	0
ENSMUSG00000060224	Pyroxd2	0	-1.12928	0
ENSMUSG00000036944	NA	0	-1.11948	0
ENSMUSG00000096935	1700113A16Rik	0	-1.11548	0
ENSMUSG00000036381	P2ry14	0	-1.11289	0
ENSMUSG00000053411	Cbx7	0	-1.10692	0
ENSMUSG00000040272	Accs	0	-1.08199	0
ENSMUSG00000034110	Kctd7	0	-1.07346	0
ENSMUSG00000024610	Cd74	0	-1.04799	0
ENSMUSG00000028459	Cd72	0	-1.03761	0
ENSMUSG00000061451	Tmem151a	0	-1.02674	0
ENSMUSG00000000154	Slc22a18	0	-1.026	0
ENSMUSG00000027952	Pmvk	0	-1.02524	0
ENSMUSG00000093930	NA	0	-1.01865	0
ENSMUSG00000108934	Gm44732	0	-1.01641	0
ENSMUSG00000000552	NA	0	-1.01485	0
ENSMUSG00000037664	Cdkn1c	0	-1.01336	0
ENSMUSG00000028756	Pink1	0	-1.00659	0
ENSMUSG00000030844	Rgs10	0	-1.00582	0
ENSMUSG00000022667	NA	0	-0.996177	0
ENSMUSG00000086742	Gm16201	0	-0.988859	0
ENSMUSG00000059824	Dbp	0	-0.978752	0
ENSMUSG00000085295	4930430E12Rik	0	0	1.07728
ENSMUSG00000045362	Tnfrsf26	0	0	1.08169
ENSMUSG00000047180	Neurl3	0	0	1.0879
ENSMUSG00000032014	NA	0	0	1.09278
ENSMUSG00000053398	Phgdh	0	0	1.09917
ENSMUSG00000031149	Praf2	0	0	1.11181
ENSMUSG00000024538	Ppic	0	0	1.11373
ENSMUSG00000047250	Ptgs1	0	0	1.11396
ENSMUSG00000024953	Prdx5	0	0	1.1278
ENSMUSG00000021403	NA	0	0	1.12878
ENSMUSG00000042190	Cmklr1	0	0	1.13137
ENSMUSG00000039982	Dtx4	0	0	1.13343
ENSMUSG00000025591	Tma16	0	0	1.13665
ENSMUSG00000026558	Uck2	0	0	1.14644
ENSMUSG00000006398	Cdc20	0	0	1.14861
ENSMUSG00000012519	Mlkl	0	0	1.15018
ENSMUSG00000027276	Jag1	0	0	1.15261
ENSMUSG00000025804	NA	0	0	1.16778
ENSMUSG00000064215	Ifi27	0	0	1.16941
ENSMUSG00000102055	Gm28913	0	0	1.16993
ENSMUSG00000023495	NA	0	0	1.1715
ENSMUSG00000026981	Il1rn	0	0	1.17402
ENSMUSG00000028266	Lmo4	0	0	1.17566
ENSMUSG00000073676	Hspe1	0	0	1.1819
ENSMUSG00000051439	Cd14	0	0	1.18211
ENSMUSG00000025921	Rdh10	0	0	1.18495
ENSMUSG00000032892	Rangrf	0	0	1.18763
ENSMUSG00000025911	Adhfe1	0	0	1.20062
ENSMUSG00000090307	1700071M16Rik	0	0	1.20144
ENSMUSG00000050957	Insl6	0	0	1.20436
ENSMUSG00000020227	Irak3	0	0	1.21251
ENSMUSG00000022863	NA	0	0	1.21558
ENSMUSG00000024778	Fas	0	0	1.21927
ENSMUSG00000017009	Sdc4	0	0	1.22999
ENSMUSG00000006205	Htra1	0	0	1.23251
ENSMUSG00000034212	Ankmy1	0	0	1.23397
ENSMUSG00000018882	Mrpl45	0	0	1.23989
ENSMUSG00000027804	Ppid	0	0	1.24583
ENSMUSG00000021759	NA	0	0	1.25574
ENSMUSG00000062248	Cks2	0	0	1.25601
ENSMUSG00000015850	Adamtsl4	0	0	1.25634
ENSMUSG00000032724	Abtb2	0	0	1.26542
ENSMUSG00000028195	Cyr61	0	0	1.26984
ENSMUSG00000039753	Fbxl5	0	0	1.28304
ENSMUSG00000028378	Ptgr1	0	0	1.28496
ENSMUSG00000021493	Pdlim7	0	0	1.29117
ENSMUSG00000042677	Zc3h12a	0	0	1.29859
ENSMUSG00000053101	NA	0	0	1.3046
ENSMUSG00000037071	Scd1	0	0	1.31363
ENSMUSG00000019539	Rcn3	0	0	1.32029
ENSMUSG00000056671	Prelid2	0	0	1.32071
ENSMUSG00000034266	NA	0	0	1.32915
ENSMUSG00000025823	Pdia4	0	0	1.33054
ENSMUSG00000021270	Hsp90aa1	0	0	1.33936
ENSMUSG00000039405	Prss23	0	0	1.34023
ENSMUSG00000026817	Ak1	0	0	1.35364
ENSMUSG00000056501	Cebpb	0	0	1.36305
ENSMUSG00000083899	Gm12346	0	0	1.36923
ENSMUSG00000003955	NA	0	0	1.37314
ENSMUSG00000079197	Psme2	0	0	1.38417
ENSMUSG00000060703	Cd302	0	0	1.39836
ENSMUSG00000053175	Bcl3	0	0	1.43288
ENSMUSG00000087400	Gm15270	0	0	1.43693
ENSMUSG00000018417	Myo1b	0	0	1.44805
ENSMUSG00000034220	Gpc1	0	0	1.45264
ENSMUSG00000105813	Gm42928	0	0	1.45355
ENSMUSG00000031444	F10	0	0	1.46216
ENSMUSG00000042215	Bag2	0	0	1.51353
ENSMUSG00000036256	Igfbp7	0	0	1.53103
ENSMUSG00000056749	Nfil3	0	0	1.56772
ENSMUSG00000042284	NA	0	0	1.60407
ENSMUSG00000040663	Clcf1	0	0	1.62852
ENSMUSG00000032372	Plscr2	0	0	1.62887
ENSMUSG00000034205	Loxl2	0	0	1.64681
ENSMUSG00000028766	Alpl	0	0	1.69578
ENSMUSG00000036564	Ndrg4	0	0	1.71823
ENSMUSG00000043099	Hic1	0	0	1.73194
ENSMUSG00000031779	Ccl22	0	0	1.75256
ENSMUSG00000097056	Gm4262	0	0	1.79141
ENSMUSG00000030745	Il21r	0	0	1.81669
ENSMUSG00000005950	P2rx5	0	0	1.81876
ENSMUSG00000021575	NA	0	0	1.84567
ENSMUSG00000063611	Gm10134	0	0	1.89308
ENSMUSG00000055301	Adh7	0	0	1.9102
ENSMUSG00000042821	Snai1	0	0	1.93553
ENSMUSG00000021411	NA	0	0	2.03562
ENSMUSG00000110652	Gm33023	0	0	2.10434
ENSMUSG00000031740	Mmp2	0	0	2.11548
ENSMUSG00000101431	Gm7901	0	0	2.13516
ENSMUSG00000098362	Mir130c	0	0	2.14975
ENSMUSG00000046245	Pilra	0	0	2.18086
ENSMUSG00000106155	Gm43495	0	0	2.25987
ENSMUSG00000018604	Tbx3	0	0	2.29921
ENSMUSG00000062783	Csprs	0	0	2.30256
ENSMUSG00000021303	NA	0	0	2.31194
ENSMUSG00000054256	Msi1	0	0	2.45066
ENSMUSG00000000730	Dnmt3l	0	0	2.48543
ENSMUSG00000000409	Lck	0	0	2.50779
ENSMUSG00000027661	Slc2a10	0	0	2.60204
ENSMUSG00000090145	Ugt1a6b	0	0	2.60334
ENSMUSG00000092569	Gm20544	0	0	2.70044
ENSMUSG00000022840	NA	0	0	2.71272
ENSMUSG00000075588	Hoxb2	0	0	2.94486
ENSMUSG00000032578	Cish	0	0	2.96578
ENSMUSG00000030895	Hpx	0	0	3
ENSMUSG00000046314	NA	0	0	3
ENSMUSG00000027859	Ngf	0	0	3.0163
ENSMUSG00000041482	Piezo2	0	0	3.0163
ENSMUSG00000075602	Ly6a	0	0	3.01792
ENSMUSG00000032915	Adgre4	0	0	3.05311
ENSMUSG00000041202	Pla2g2d	0	0	3.05889
ENSMUSG00000019122	Ccl9	0	0	3.08444
ENSMUSG00000037379	Spon2	0	0	3.11548
ENSMUSG00000045319	Proser2	0	0	3.24793
ENSMUSG00000007805	Twist2	0	0	3.41504
ENSMUSG00000094910	D430019H16Rik	0	0	3.45943
ENSMUSG00000082976	Gm15056	0	0	3.45943
ENSMUSG00000032420	NA	0	0	3.63227
ENSMUSG00000044337	Ackr3	0	0	3.63227
ENSMUSG00000063727	Tnfrsf11b	0	0	3.70044
ENSMUSG00000054905	Stfa3	0	0	3.80735
ENSMUSG00000063415	Cyp26b1	0	0	3.87915
ENSMUSG00000022144	NA	0	0	3.90689
ENSMUSG00000075707	Dio3	0	0	3.9386
ENSMUSG00000100980	Gm29100	0	0	4
ENSMUSG00000006777	Krt23	0	0	4.12928
ENSMUSG00000023391	Dlx2	0	0	4.16993
ENSMUSG00000053475	Tnfaip6	0	0	4.44294
ENSMUSG00000037428	Vgf	0	0	4.49185
ENSMUSG00000028965	Tnfrsf9	0	0	5.08746
ENSMUSG00000057604	Lmcd1	0	0	5.20945
ENSMUSG00000024334	H2-Oa	0	0	5.24793
ENSMUSG00000032532	NA	0	0	5.85798
ENSMUSG00000103015	Gm37549	0	0	5.62921
ENSMUSG00000086515	Erich2os	0	0	5.05889
ENSMUSG00000051515	Fam181b	0	0	4.71494
ENSMUSG00000106609	Gm43181	0	0	4.76939
ENSMUSG00000074183	Gsta1	0	0	4.53806
ENSMUSG00000074695	Il22	0	0	4.47393
ENSMUSG00000085755	Gm13496	0	0	4.47393
ENSMUSG00000004951	Hspb1	0	0.968291	1.70987
ENSMUSG00000058755	Osm	0	0.995499	1.63118
ENSMUSG00000024041	NA	0	1.02834	1.60768
ENSMUSG00000027800	Tm4sf1	0	1.06463	1.967
ENSMUSG00000015652	Steap1	0	1.08869	1.85361
ENSMUSG00000044162	Tnip3	0	1.11859	1.74961
ENSMUSG00000029322	Plac8	0	1.12315	2.66297
ENSMUSG00000023262	NA	0	1.14104	1.66696
ENSMUSG00000091971	Hspa1a	0	1.15612	1.94258
ENSMUSG00000035493	NA	0	1.21883	1.75888
ENSMUSG00000024772	Ehd1	0	1.26995	2.09478
ENSMUSG00000028773	Fabp3	0	1.30671	1.99135
ENSMUSG00000028525	Pde4b	0	1.34624	2.13224
ENSMUSG00000003541	Ier3	0	1.35464	2.26522
ENSMUSG00000044103	Il1f9	0	1.36171	2.57032
ENSMUSG00000018648	Dusp14	0	1.40599	2.80735
ENSMUSG00000039693	Msantd3	0	1.42084	2.15303
ENSMUSG00000026475	Rgs16	0	1.44057	2.13841
ENSMUSG00000039519	Cyp7b1	0	1.4479	1.93769
ENSMUSG00000035356	NA	0	1.49788	2.12827
ENSMUSG00000031963	NA	0	1.55154	2.18472
ENSMUSG00000005800	NA	0	1.574	3.03579
ENSMUSG00000022367	Has2	0	1.63346	3.16993
ENSMUSG00000020108	NA	0	1.68293	2.24793
ENSMUSG00000078921	Tgtp2	0	1.69661	2.58496
ENSMUSG00000023224	Serping1	0	1.72186	2.38747
ENSMUSG00000021025	NA	0	1.72508	2.21516
ENSMUSG00000033355	Rtp4	0	1.7595	2.34834
ENSMUSG00000028179	Cth	0	1.8953	2.51873
ENSMUSG00000063354	NA	0	1.90689	3.22239
ENSMUSG00000029082	Bst1	0	1.91906	2.35541
ENSMUSG00000035385	Ccl2	0	1.92766	2.76967
ENSMUSG00000060550	NA	0	1.99286	2.34726
ENSMUSG00000066682	Pilrb2	0	2.00456	3.1375
ENSMUSG00000035373	Ccl7	0	2.05166	2.6652
ENSMUSG00000023349	Clec4n	0	2.06876	2.70399
ENSMUSG00000026875	Traf1	0	2.07607	2.63427
ENSMUSG00000041605	Inava	0	2.17273	2.88874
ENSMUSG00000053113	Socs3	0	2.17677	2.53037
ENSMUSG00000020785	Camkk1	0	2.3152	3.44846
ENSMUSG00000006403	NA	0	2.32833	3.52356
ENSMUSG00000050737	Ptges	0	2.42089	3.03355
ENSMUSG00000032373	NA	0	2.47573	3.80735
ENSMUSG00000020264	Slc36a2	0	2.49033	3.20328
ENSMUSG00000006818	NA	0	2.50937	3.0758
ENSMUSG00000027399	Il1a	0	2.51655	3.30325
ENSMUSG00000001131	Timp1	0	2.53684	3.30053
ENSMUSG00000085498	Gm14023	0	2.6468	3.68724
ENSMUSG00000021765	NA	0	2.67948	3.16993
ENSMUSG00000062345	Serpinb2	0	2.71652	3.17315
ENSMUSG00000066684	Pilrb1	0	2.96413	3.67076
ENSMUSG00000102037	Bcl2a1a	0	2.96853	3.14999
ENSMUSG00000045551	Fpr1	0	3.03242	5.44018
ENSMUSG00000029409	U90926	0	3.07039	6.40939
ENSMUSG00000029380	Cxcl1	0	3.20188	3.99548
ENSMUSG00000004885	Crabp2	0	3.28011	5.72792
ENSMUSG00000045502	Hcar2	0	3.32992	4.55152
ENSMUSG00000019987	NA	0	3.44517	4.23693
ENSMUSG00000032487	Ptgs2	0	3.68436	4.64014
ENSMUSG00000031722	Hp	0	3.74134	4.59331
ENSMUSG00000015314	Slamf6	0	3.75107	4.80511
ENSMUSG00000030474	Siglece	0	4.07039	5.03407
ENSMUSG00000026822	Lcn2	0	4.43045	5.34577
ENSMUSG00000052270	Fpr2	0	4.61415	5.37428
ENSMUSG00000029379	Cxcl3	0	6.42066	7.83352
ENSMUSG00000016283	H2-M2	0	7.37678	7.91615
ENSMUSG00000025777	Gdap1	0	0	-4.40682
ENSMUSG00000048572	Tmem252	0	0	-4.47393
ENSMUSG00000058153	Sez6l	0	0	-4.65836
ENSMUSG00000047420	Fam180a	0	0	-4.76939
ENSMUSG00000030147	Clec4b1	0	0	-4.76939
ENSMUSG00000103883	Gm37010	0	0	-5.49185
ENSMUSG00000000303	Cdh1	0	0	-5.04439
ENSMUSG00000074505	NA	0	0	-4.90689
ENSMUSG00000044217	NA	0	0	-4.04439
ENSMUSG00000022490	NA	0	0	-3.96347
ENSMUSG00000031898	Dpep3	0	0	-3.77259
ENSMUSG00000064065	Ipcef1	0	0	-3.40599
ENSMUSG00000022096	Hr	0	0	-3.32193
ENSMUSG00000097974	Gm10605	0	0	-3
ENSMUSG00000087486	Gm11723	0	0	-2.78427
ENSMUSG00000074899	NA	0	0	-2.36257
ENSMUSG00000025105	Bnc1	0	0	-2.22827
ENSMUSG00000074677	Sirpb1c	0	0	-2.22651
ENSMUSG00000032348	NA	0	0	-2.15528
ENSMUSG00000032911	NA	0	0	-2.03103
ENSMUSG00000027463	Slc52a3	0	0	-1.98185
ENSMUSG00000022836	NA	0	0	-1.87447
ENSMUSG00000029648	Flt1	0	0	-1.75132
ENSMUSG00000031497	Tnfsf13b	0	0	-1.74802
ENSMUSG00000048240	Gng7	0	0	-1.73697
ENSMUSG00000068876	Cgn	0	0	-1.6644
ENSMUSG00000021720	NA	0	0	-1.64386
ENSMUSG00000015451	C4a	0	0	-1.63982
ENSMUSG00000043719	Col6a6	0	0	-1.62902
ENSMUSG00000023019	Gpd1	0	0	-1.62059
ENSMUSG00000026170	Cyp27a1	0	0	-1.60005
ENSMUSG00000001507	Itga3	0	0	-1.5953
ENSMUSG00000041695	Kcnj2	0	0	-1.57222
ENSMUSG00000039013	Siglecf	0	0	-1.55459
ENSMUSG00000029765	Plxna4	0	0	-1.5523
ENSMUSG00000092274	Neat1	0	0	-1.54571
ENSMUSG00000031442	Mcf2l	0	0	-1.54078
ENSMUSG00000009551	6330409D20Rik	0	0	-1.52509
ENSMUSG00000072847	A530017D24Rik	0	0	-1.4752
ENSMUSG00000022469	NA	0	0	-1.45275
ENSMUSG00000037685	Atp8a1	0	0	-1.42379
ENSMUSG00000022508	Bcl6	0	0	-1.37851
ENSMUSG00000043290	Zfp784	0	0	-1.36257
ENSMUSG00000041842	Fhdc1	0	0	-1.34824
ENSMUSG00000068551	Zfp467	0	0	-1.32193
ENSMUSG00000097026	Gm26786	0	0	-1.31046
ENSMUSG00000043192	Gm1840	0	0	-1.28716
ENSMUSG00000035759	NA	0	0	-1.28605
ENSMUSG00000050503	Fbxl22	0	0	-1.27045
ENSMUSG00000110457	Gm45752	0	0	-1.25987
ENSMUSG00000034522	NA	0	0	-1.25758
ENSMUSG00000062585	Cnr2	0	0	-1.25258
ENSMUSG00000030064	Frmd4b	0	0	-1.20421
ENSMUSG00000039959	Hip1	0	0	-1.20319
ENSMUSG00000100975	NA	0	0	-1.18658
ENSMUSG00000035441	Myo1d	0	0	-1.17848
ENSMUSG00000021186	NA	0	0	-1.17403
ENSMUSG00000055322	Tns1	0	0	-1.16386
ENSMUSG00000015890	Amdhd1	0	0	-1.16332
ENSMUSG00000067591	Klra3	0	0	-1.15364
ENSMUSG00000020143	Dock2	0	0	-1.15311
ENSMUSG00000066829	NA	0	0	-1.15116
ENSMUSG00000031659	Adcy7	0	0	-1.14106
ENSMUSG00000029189	Sel1l3	0	0	-1.12542
ENSMUSG00000051107	NA	0	0	-1.12399
ENSMUSG00000056602	Fry	0	0	-1.12087
ENSMUSG00000041439	Mfsd6	0	0	-1.11643
ENSMUSG00000041797	Abca9	0	0	-1.10149
ENSMUSG00000049119	Fam110b	0	0	-1.1006
ENSMUSG00000007379	Dennd2c	0	0	-1.08746
ENSMUSG00000035547	Capn5	0	0	-1.08529
ENSMUSG00000055541	Lair1	0	0	-1.0791
ENSMUSG00000027435	Cd93	0	0	-1.07543
ENSMUSG00000038024	Dennd4c	0	0	-1.07193
ENSMUSG00000041216	Clvs1	0	0	-1.06902
ENSMUSG00000029166	Mapre3	0	0	-1.06671
ENSMUSG00000054051	NA	0	0	-1.06613
ENSMUSG00000016349	Eef1a2	0	0	-1.06606
ENSMUSG00000074738	Fndc10	0	0	-1.0634
ENSMUSG00000074342	I830077J02Rik	0	0	-1.06274
ENSMUSG00000041112	NA	0	0	-1.05918
ENSMUSG00000038886	Man2a2	0	0	-1.05742
ENSMUSG00000009418	Nav1	0	0	-1.05624
ENSMUSG00000096755	NA	0	0	-1.0555
ENSMUSG00000097729	NA	0	0	-1.04968
ENSMUSG00000086090	Gm12531	0	0	-1.04026
ENSMUSG00000020387	Jade2	0	0	-1.03942
ENSMUSG00000042500	Ago4	0	0	-1.03817
ENSMUSG00000027947	Il6ra	0	0	-1.02869
ENSMUSG00000085148	Mir22hg	0	0	-1.02626
ENSMUSG00000039157	Fam102a	0	0	-1.02575
ENSMUSG00000019843	Fyn	0	0	-1.02419
ENSMUSG00000044629	Cnrip1	0	0	-1.023
ENSMUSG00000067714	Lpar5	0	0	-1.01874
ENSMUSG00000109715	Gm45606	0	0	-1.01074
ENSMUSG00000022788	Fgd4	0	0	-1.01034
ENSMUSG00000027111	Itga6	0	0	-1.01017
ENSMUSG00000026764	Kif5c	0	0	-1.00769
ENSMUSG00000028088	Fmo5	0	0	-1.00742
ENSMUSG00000030329	Pianp	0	0	-1.00374
ENSMUSG00000031451	Gas6	0	0	-1.00327
ENSMUSG00000022408	NA	0	0	-0.995888
ENSMUSG00000051457	Spn	0	0	-0.994686
ENSMUSG00000035273	Hpse	0	0	-0.993397
ENSMUSG00000021273	NA	0	0	-0.987892
ENSMUSG00000037509	NA	0	0	-0.985597
ENSMUSG00000001741	Il16	0	0	-0.985558
ENSMUSG00000097582	Gm26527	0	0	-0.978982
ENSMUSG00000017754	Pltp	0	0	-0.975489
ENSMUSG00000022419	NA	0	0	-0.974569
ENSMUSG00000024986	Hhex	0	0	-0.973842
ENSMUSG00000074577	Ripor3	0	0	-0.973689
ENSMUSG00000032245	Cln6	0	0	-0.968018
ENSMUSG00000037370	Enpp1	0	0	-0.954976
ENSMUSG00000021876	NA	0	0	-0.949915
ENSMUSG00000070390	Nlrp1b	0	0	-0.948161
ENSMUSG00000035735	Dagla	0	0	-0.945176
ENSMUSG00000030557	Mef2a	0	0	-0.943364
ENSMUSG00000097542	Gm26751	0	0	-0.942991
ENSMUSG00000048249	Crebrf	0	0	-0.937536
ENSMUSG00000086241	4930483K19Rik	0	0	-0.930737
ENSMUSG00000062515	Fabp4	0	0	-0.928285
ENSMUSG00000043252	Tmem64	0	0	-0.92423
ENSMUSG00000026080	Chst10	0	0	-0.923789
ENSMUSG00000042644	Itpr3	0	0	-0.921397
ENSMUSG00000031216	Stard8	0	0	-0.916456
ENSMUSG00000038068	NA	0	0	-0.915756
ENSMUSG00000005442	Cic	0	0	-0.915414
ENSMUSG00000038967	Pdk2	0	0	-0.909302
ENSMUSG00000025473	Adam8	0	0	-0.908491
ENSMUSG00000036687	Tmem184a	0	0	-0.89724
ENSMUSG00000028465	Tln1	0	0	-0.886254
ENSMUSG00000001435	NA	0	0.988859	0
ENSMUSG00000060044	NA	0	0.991963	0
ENSMUSG00000026208	Des	0	1.00248	0
ENSMUSG00000035208	NA	0	1.00317	0
ENSMUSG00000001542	NA	0	1.00442	0
ENSMUSG00000059901	Adamts14	0	1.00552	0
ENSMUSG00000052698	NA	0	1.00727	0
ENSMUSG00000004609	Cd33	0	1.01073	0
ENSMUSG00000029657	Hsph1	0	1.01554	0
ENSMUSG00000054843	Atrnl1	0	1.02242	0
ENSMUSG00000022094	Slc39a14	0	1.02394	0
ENSMUSG00000058046	4933430I17Rik	0	1.02537	0
ENSMUSG00000109947	Gm45669	0	1.0284	0
ENSMUSG00000018672	Copz2	0	1.03477	0
ENSMUSG00000060600	Eno3	0	1.0372	0
ENSMUSG00000086968	4933431E20Rik	0	1.04947	0
ENSMUSG00000072572	NA	0	1.05393	0
ENSMUSG00000000753	Serpinf1	0	1.05556	0
ENSMUSG00000062590	Armc9	0	1.06295	0
ENSMUSG00000108524	Gm44876	0	1.07039	0
ENSMUSG00000026535	Ifi202b	0	1.07805	0
ENSMUSG00000084159	Gm12696	0	1.08017	0
ENSMUSG00000028364	Tnc	0	1.08037	0
ENSMUSG00000049985	NA	0	1.08394	0
ENSMUSG00000022425	NA	0	1.08937	0
ENSMUSG00000056592	Zfp658	0	1.09811	0
ENSMUSG00000030516	Tjp1	0	1.11094	0
ENSMUSG00000067586	NA	0	1.11247	0
ENSMUSG00000040033	NA	0	1.12739	0
ENSMUSG00000028982	Slc25a33	0	1.12928	0
ENSMUSG00000015653	Steap2	0	1.13032	0
ENSMUSG00000000982	Ccl3	0	1.13057	0
ENSMUSG00000109408	A930037H05Rik	0	1.13706	0
ENSMUSG00000033900	Map9	0	1.1394	0
ENSMUSG00000039384	Dusp10	0	1.14107	0
ENSMUSG00000046879	NA	0	1.1423	0
ENSMUSG00000001630	Stk38l	0	1.14348	0
ENSMUSG00000029108	Pcdh7	0	1.14886	0
ENSMUSG00000050953	NA	0	1.15232	0
ENSMUSG00000026131	Dst	0	1.15319	0
ENSMUSG00000053965	Pde5a	0	1.15948	0
ENSMUSG00000053007	Creb5	0	1.18442	0
ENSMUSG00000026586	Prrx1	0	1.18894	0
ENSMUSG00000021338	Carmil1	0	1.18982	0
ENSMUSG00000069874	Irgm2	0	1.20232	0
ENSMUSG00000031502	Col4a1	0	1.21845	0
ENSMUSG00000070327	Rnf213	0	1.22006	0
ENSMUSG00000022995	Enah	0	1.22465	0
ENSMUSG00000026104	Stat1	0	1.22652	0
ENSMUSG00000033192	Lpcat2	0	1.22763	0
ENSMUSG00000037921	Ddx60	0	1.22964	0
ENSMUSG00000033965	Slc16a2	0	1.23041	0
ENSMUSG00000029798	Herc6	0	1.24264	0
ENSMUSG00000086801	Gm15943	0	1.24445	0
ENSMUSG00000097216	4932441J04Rik	0	1.24638	0
ENSMUSG00000044468	Tent5c	0	1.24931	0
ENSMUSG00000033880	Lgals3bp	0	1.25877	0
ENSMUSG00000101859	Gm29233	0	1.26303	0
ENSMUSG00000037621	Atoh8	0	1.26552	0
ENSMUSG00000109669	Gm45472	0	1.28379	0
ENSMUSG00000027580	Helz2	0	1.28405	0
ENSMUSG00000023961	Enpp4	0	1.29326	0
ENSMUSG00000078606	Gm4070	0	1.29433	0
ENSMUSG00000105558	Gm5855	0	1.29624	0
ENSMUSG00000027959	NA	0	1.29914	0
ENSMUSG00000028480	Glipr2	0	1.30463	0
ENSMUSG00000039236	Isg20	0	1.31288	0
ENSMUSG00000031558	Slit2	0	1.32978	0
ENSMUSG00000027962	Vcam1	0	1.34152	0
ENSMUSG00000026536	Ifi211	0	1.35857	0
ENSMUSG00000035357	Pdzrn3	0	1.35979	0
ENSMUSG00000085604	Dhx58os	0	1.36636	0
ENSMUSG00000022146	Osmr	0	1.37267	0
ENSMUSG00000043811	Rtn4r	0	1.38163	0
ENSMUSG00000022687	NA	0	1.39046	0
ENSMUSG00000097474	Gm26584	0	1.40263	0
ENSMUSG00000042804	Gpr153	0	1.40571	0
ENSMUSG00000085894	Gm15832	0	1.4073	0
ENSMUSG00000025324	Atp10a	0	1.41504	0
ENSMUSG00000028194	Ddah1	0	1.42626	0
ENSMUSG00000013367	Iglon5	0	1.43463	0
ENSMUSG00000010830	NA	0	1.45388	0
ENSMUSG00000057596	Trim30d	0	1.46587	0
ENSMUSG00000102813	Gm37795	0	1.47661	0
ENSMUSG00000091730	Gm17230	0	1.47955	0
ENSMUSG00000019301	Hsd17b1	0	1.51019	0
ENSMUSG00000097567	Gm26637	0	1.51824	0
ENSMUSG00000031951	Tmem231	0	1.53172	0
ENSMUSG00000004558	NA	0	1.53874	0
ENSMUSG00000030077	Chl1	0	1.55943	0
ENSMUSG00000020303	Stc2	0	1.5755	0
ENSMUSG00000028347	Tmeff1	0	1.58496	0
ENSMUSG00000002289	NA	0	1.58991	0
ENSMUSG00000092130	NA	0	1.59644	0
ENSMUSG00000101939	Gm28438	0	1.60326	0
ENSMUSG00000046352	Gjb2	0	1.60334	0
ENSMUSG00000044703	Phf11a	0	1.66234	0
ENSMUSG00000079457	Gm7609	0	1.66297	0
ENSMUSG00000029223	Uchl1	0	1.67557	0
ENSMUSG00000041449	Serpina3h	0	1.70627	0
ENSMUSG00000044453	Ffar1	0	1.7425	0
ENSMUSG00000062184	Hs6st2	0	1.74543	0
ENSMUSG00000027322	Siglec1	0	1.74799	0
ENSMUSG00000033227	Wnt6	0	1.77761	0
ENSMUSG00000060429	NA	0	1.77761	0
ENSMUSG00000021614	Vcan	0	1.92803	0
ENSMUSG00000070501	NA	0	1.9542	0
ENSMUSG00000019889	NA	0	1.97797	0
ENSMUSG00000079014	Serpina3i	0	2.01197	0
ENSMUSG00000028487	Bnc2	0	2.078	0
ENSMUSG00000089665	Fcor	0	2.11548	0
ENSMUSG00000044365	Cxxc4	0	2.15754	0
ENSMUSG00000099568	Gm28513	0	2.24101	0
ENSMUSG00000085786	Gm15987	0	2.26303	0
ENSMUSG00000098816	Gm27786	0	2.27563	0
ENSMUSG00000010044	Zmynd10	0	2.29768	0
ENSMUSG00000022887	NA	0	2.34577	0
ENSMUSG00000054072	Iigp1	0	2.43105	0
ENSMUSG00000023914	Mep1a	0	2.43296	0
ENSMUSG00000097804	Gm16685	0	2.48543	0
ENSMUSG00000001168	Oas1h	0	2.5025	0
ENSMUSG00000046687	NA	0	2.66297	0
ENSMUSG00000095134	Mid1-ps1	0	2.88264	0
ENSMUSG00000097960	A330074K22Rik	0	3.10852	0
ENSMUSG00000042244	Pglyrp3	0	3.22239	0
ENSMUSG00000038530	Rgs4	0	3.29278	0
ENSMUSG00000040280	NA	0	3.32193	0
ENSMUSG00000030584	Dpf1	0	3.32193	0
ENSMUSG00000039058	Ak5	0	3.3505	0
ENSMUSG00000085735	Mettl5os	0	3.41504	0
ENSMUSG00000010476	Ebf3	0	3.43296	0
ENSMUSG00000046447	Camk2n1	0	3.5025	0
ENSMUSG00000090231	Cfb	0	4.14935	0
ENSMUSG00000104713	Gbp6	0	4.1964	0
ENSMUSG00000041754	Trem3	0	4.32193	0
ENSMUSG00000092500	Gm20400	0	4.52356	0
ENSMUSG00000107075	Gm43068	0	4.53806	0
ENSMUSG00000044548	Dact1	0	4.58496	0
ENSMUSG00000041608	NA	0	4.90689	0
ENSMUSG00000051748	Wfdc21	0	4.9542	0
ENSMUSG00000029417	Cxcl9	0	5.12928	0
ENSMUSG00000097418	Mir155hg	0	5.45943	0
ENSMUSG00000047959	Kcna3	0	5.58496	0
ENSMUSG00000019944	Rhobtb1	0	1.8842	1.52303
ENSMUSG00000050108	Bpifc	0	6.45121	2.45943
ENSMUSG00000027514	Zbp1	0	2.97826	2.52033
ENSMUSG00000097789	Gm2115	0	3.71741	2.85415
ENSMUSG00000050751	Pgbd5	0	3.88753	2.86129
ENSMUSG00000022015	Tnfsf11	0	4.22239	3.5325
ENSMUSG00000034855	Cxcl10	0	4.9542	3.58496
ENSMUSG00000068129	Cst7	0	7.05528	3.61298
ENSMUSG00000039196	Orm1	0	4.87938	4.07724
ENSMUSG00000041696	NA	0	7.09452	4.11548
ENSMUSG00000025746	Il6	0	7.29155	4.29278
ENSMUSG00000027398	Il1b	0	7.75107	6.68523
