# Supplementary material for: Host sirtuin 2 as an immunotherapeutic target against tuberculosis
Source: eLife. 2020 Jul 22;9:e55415. doi: 10.7554/eLife.55415 (PMC7398663; doi:10.7554/eLife.55415)
Supplement: Figure 4—source data 1. — Source data for Figure 4C–F and H–R. [file elife-55415-fig4-data1.xlsx]

## Sheet: Sheet1
	4C					4D					4E					4F
	CD11b					CD11c					CD80					MHCII
	1	2	3	4		1	2	3	4		1	2	3	4		1	2	3	4
Exp 1	6253	15732	18074	12218	Exp 1	1555	1709	2292	2117	Exp 1	370	585	494	592	Exp 1	3674	5526	3919	6165
	5967	12047	17733	12311		1665	1761	2218	2176		342	622	411	618		3527	6034	4817	6265
	5940	12127	14664	10888		1670	1825	2069	1738		341	609	492	504		3522	6046	4281	5108
Exp 2	5000	13989	14666	13782	Exp 2	1212	1644	2077	1733	Exp 2	210	450	510	620	Exp 2	3001	4891	3343	7210
	4321	14234	18236	15231		1423	1590	1923	2138		270	530	460	710		3389	6323	4102	6323
	4772	15231	12983	10231		1321	1665	2249	1823		250	600	432	497		3111	5534	3867	5787
	4H					4I					4J					4K					4L					4M
	CD4					CD4CD69					CD4CD25					CD8					CD8CD69					CD8CD25
	1	2	3	4		1	2	3	4		1	2	3	4		1	2	3	4		1	2	3	4		1	2	3	4
Exp 1	60.3	54.9	50.1	55.3	Exp 1	19.9	49.7	55.9	59.8	Exp 1	15.6	38.1	48.3	59.6	Exp 1	43.2	43.6	43.5	44.7	Exp 1	13.7	35.6	44	53.9	Exp 1	15.8	27.1	40.1	57.6
	59.5	54.6	50.6	56.4		21.3	49.2	55.8	58.9		15.1	37.3	46.4	58.9		45.9	43.1	44.5	43.8		10.2	35.5	43.1	55.3		13.5	25.9	38.4	57.5
	60.7	53.9	49.5	56.5		21.2	49.7	54.1	59.3		15.2	40.4	45	58.7		44.7	48.5	45	43.7		10.5	29	44.3	54.6		13.1	22.7	38.8	57
Exp 2	55.2	55.8	54.3	60.3	Exp 2	11.9	32.3	48.2	52.4	Exp 2	19.3	33.1	40.9	49.5	Exp 2	34.4	35.4	27.9	29.9	Exp 2	10.7	22.2	37.6	47.8	Exp 2	9.9	27.1	37	60.1
	50.1	49.8	56.2	60.5		11.4	38.8	45.2	42.6		24.1	35.2	44.8	52.3		31.2	37.3	36.3	35.9		11	27.5	40	45.3		10	29.8	42.9	58.9
	56.2	50.3	58.1	49.1		24.6	36.4	40.2	55.2		14.2	36.3	48.1	56.5		33.3	30.1	40	37.7		14.4	30.1	33.2	50.1		9.89	20.2	35.2	50.2
	4N					4O					4P					4Q
	CD4IFNg					CD4IL17					CD8IFNg					CD8IL17
	1	2	3	4		1	2	3	4		1	2	3	4		1	2	3	4
Exp 1					Exp 1					Exp 1					Exp 1
	3.58	4.5	8.19	11.2		4.83	5.21	9.96	18.2		4.2	5.6	6.74	9.16		3.77	3.14	8.52	13.1
	3.64	4.63	8.34	14.5		4.96	4	11.9	10.5		5.35	5.08	7.6	9.83		3.6	2.54	9.74	14.5
Exp 2	3.44	6.15	11.7	11.7	Exp 2	5.75	5.64	9.08	16.3	Exp 2	3.92	3.45	9.38	9.11	Exp 2	1.32	1.29	11.8	16.3
	2.87	3.58	11.9	9.01		6.53	6.35	11.2	11.6		3.83	8.59	7.69	10.2		1.64	2.7	10.2	12.6
	3.39	5.17	7.8	8.83		4.2	7.86	10.6	13		4.93	5.81	6.49	9.41		3.44	3.6	8.11	14.34
	4R
	1	2	3	4
Exp 1	12000	6800	2000	800
	10000	5200	2500	500
	15000	7900	1900	300
Exp 2	34000	10000	5000	1200
	45000	16000	7000	200
	63000	21000	3000	1500
