# Supplementary material for: Host sirtuin 2 as an immunotherapeutic target against tuberculosis
Source: eLife. 2020 Jul 22;9:e55415. doi: 10.7554/eLife.55415 (PMC7398663; doi:10.7554/eLife.55415)
Supplement: Figure 5—source data 1. — Source data for Figure 5C, D and E. [file elife-55415-fig5-data1.xlsx]

## Sheet: Sheet1
	5C			5D					5E
				H3K18					NFkB
	SIRT2			Naïve		infected			Naïve		infected
	naïve	infected		Cnt	AGK2	Cnt	AGK2		Cnt	AGK2	Cnt	AGK2
	418	602		969	934	1441	1710		918	998	923	1453
	397	611		987	913	1180	1740		902	986	939	1416
	437	603		868	940	1155	1632		923	1012	911	1433
	t-test	9.37273e-05			0.761337		0.0109037			0.00101249		2.87133e-06
