# Supplementary material for: Host sirtuin 2 as an immunotherapeutic target against tuberculosis
Source: eLife. 2020 Jul 22;9:e55415. doi: 10.7554/eLife.55415 (PMC7398663; doi:10.7554/eLife.55415)
Supplement: Figure 6—source data 1. — Source data for Figure 6D–J. [file elife-55415-fig6-data1.xlsx]

## Sheet: Sheet1
	6D
	Cnt	AGK2
	15	5
	20	2.5
	25	2.5
	17.5	5
	t-test	0.000445884
	6E			6F			6G			6H			6I			6J
	Cnt	AGK2		Cnt	AGK2		Cnt	AGK2		Cnt	AGK2		Cnt	AGK2		Cnt	AGK2
Exp1	3000000	600000	Exp1	660000	160000	Exp1	510000	80000	Exp1	5700000	2700000	Exp1	180000	80000	Exp1	100000	240000
	4000000	100000		910000	40000		1000000	70000		6000000	3600000		250000	100000		50000	340000
	5800000	400000		450000	90000		320000	110000		16300000	6000000		350000	190000		80000	420000
	9000000	300000		520000	50000		660000	140000		19000000	8500000		430000	230000		200000	110000
	6700000	200000		730000	200000		870000	200000		3500000	2300000		100000	300000		300000	190000
Exp2	2680000	170000	Exp2	328000	112000	Exp2	500000	60000	Exp2	20400000	50400000	Exp2	110000	250000	Exp2	400000	400000
	3920000	70000		288000	50000		520000	80000		32000000	26800000		40000	150000		560000	370000
	1560000	240000		111000	40000		330000	50000		32400000	24300000		50000	110000		280000	100000
	2520000	280000		236000	21000		210000	40000		40000000	23000000		200000	200000		120000	350000
	960000	360000		208000	82000		380000	10000		t.test	0.663633		t.test	0.830651		t.test	0.503918
	t.test	0.000160351		t.test	0.000430578		t.test	3.14496e-05
