# Supplementary material for: Host sirtuin 2 as an immunotherapeutic target against tuberculosis
Source: eLife. 2020 Jul 22;9:e55415. doi: 10.7554/eLife.55415 (PMC7398663; doi:10.7554/eLife.55415)
Supplement: Figure 7—source data 1. — Source data for Figure 7B–I. [file elife-55415-fig7-data1.xlsx]

## Sheet: Sheet1
	7B			7C			7D			7E
	Cnt	AGK2		Cnt	AGK2		Cnt	AGK2		Cnt	AGK2
	8.31	14.8		6.51	13.7		18.9	27.3		12.1	19.9
	6.15	11.3		7.57	9.79		16.9	23.4		10.8	16.3
	7.99	12.7		5.44	11.3		17.4	24.7		9.4	17.2
	7.96	12.6		6.32	11.4		18.6	24.6		12.5	17.7
	8.23	13.8		4.4	12.7		19.7	26.5		11.3	19.2
	t-test	7.38507e-05		t-test	0.000150161		t-test	4.13268e-05		t-test	4.30212e-05
	7F			7G			7H			7I
	Cnt	AGK2		Cnt	AGK2		Cnt	AGK2		Cnt	AGK2
	12.9	13.1		24.4	24		7.76	11.6		9.16	12.1
	12.5	12.4		25.5	23.1		7.41	10.6		8.84	13.5
	13	14.6		24.4	26.7		6.86	12.5		7.91	12.2
	12.8	11.4		26.7	24.3		8.07	11.2		9.41	11.9
	13.1	13.2		25.1	22.3		5.79	9.5		10.14	13.2
	t-test	0.884829		t-test	0.219931		t-test	0.000296694		t-test	9.51762e-05
