# Supplementary material for: Host sirtuin 2 as an immunotherapeutic target against tuberculosis
Source: eLife. 2020 Jul 22;9:e55415. doi: 10.7554/eLife.55415 (PMC7398663; doi:10.7554/eLife.55415)
Supplement: Figure 8—source data 1. — Source data for Figure 8B–M. [file elife-55415-fig8-data1.xlsx]

## Sheet: Sheet1
	8B			8C			8D			8E			8F			8G
	Cnt	AGK2		Cnt	AGK2		Cnt	AGK2		Cnt	AGK2		Cnt	AGK2		Cnt	AGK2
	44	41		23.3	33.8		49.4	53.5		34.8	33.3		32.5	42.7		49.7	50.8
	43.9	38.1		24.7	33.1		50	54.4		34.7	33.3		33.3	43.4		48.4	52.3
	44.2	42.6		21.1	30.6		47.9	55.3		33.4	35		33.5	40		51.7	49.1
	41.8	37.7		21.1	32.1		46.8	52.9		35.4	34.8		33.4	40.8		51.4	54.1
	42.8	44.6		25.2	32.2		48.2	52.4		34.5	33.6		35.3	46.5		50.5	55.6
	t-test	0.105559		t-test	1.71476e-05		t-test	0.000135259		t-test	0.29122		t-test	7.58027e-05		t-test	0.155018
	8H			8I			8J			8K			8L			8M
	Cnt	AGK2		Cnt	AGK2		Cnt	AGK2		Cnt	AGK2		Cnt	AGK2		Cnt	AGK2
	33.5	39		14.4	34.2		51.9	64.5		25.7	32.8		22.4	49.9		77.4	85.5
	35.4	40.7		15.8	30.9		48.5	62.9		26.4	31.9		24.8	46.1		70.8	80.3
	31.1	38.3		16.8	31.1		51	63.5		27.4	33.2		27.1	44.9		75.8	88.8
	32.8	37.3		16.2	38.5		53.5	60.2		24.3	34.8		26.8	54.3		78.4	83.6
	33.5	43.9		14.9	34.2		52.2	65.1		26.2	32.5		23.3	49.1		76.8	86.4
	t-test	0.00122046		t-test	1.52244e-06		t-test	8.94758e-06		t-test	8.48716e-06		t-test	1.3898e-06		t-test	0.0016265
