# Supplementary material for: Host sirtuin 2 as an immunotherapeutic target against tuberculosis
Source: eLife. 2020 Jul 22;9:e55415. doi: 10.7554/eLife.55415 (PMC7398663; doi:10.7554/eLife.55415)
Supplement: Figure 9—source data 1. [file elife-55415-fig9-data1.xlsx]

## Sheet: Sheet1
	9B			9C			9D			9E			9G
	Cnt	AGK2		Cnt	AGK2		Cnt	AGK2		Cnt	AGK2		Cnt	AGK2
	7.44	9.5		5.72	9.17		6.87	9.49		7.17	8.24		1257	1313
	7.46	13		7.24	17.9		7.18	13.2		8.26	19.2		1048	1398
	7.26	13.5		6.86	16.8		8.09	14.1		7.31	19.6		1089	1337
	8.02	11.7		8.91	15.9		7.94	13.2		10.3	17		1161	1465
	6.22	11.1		5.52	14.3		6.64	11.8		5.91	17.3		1155	1401
	t-test	0.000395047		t-test	0.00129232		t-test	0.000378989		t-test	0.00480042		t-test	0.000641777
	9H			9I			9J			9K
	Cnt	AGK2		Cnt	AGK2		Cnt	AGK2		Cnt	AGK2
	7.42	15.1		3.42	12.1		11.7	11.7		2.62	7.78
	6.6	14.9		1.93	11.5		11.3	11		1.29	6.99
	6.42	17.2		1.61	13.8		10.6	13.2		0.97	9.19
	8.32	17.2		3.04	13.8		13.4	13		2.18	9.07
	7.58	15.1		2.85	11.9		11.7	11.9		2.41	7.86
	t-test	8.19854e-07		t-test	1.6168e-07		t-test	0.51661		t-test	2.29639e-06
