# Supplementary material for: Host sirtuin 2 as an immunotherapeutic target against tuberculosis
Source: eLife. 2020 Jul 22;9:e55415. doi: 10.7554/eLife.55415 (PMC7398663; doi:10.7554/eLife.55415)
Supplement: Figure 10—source data 1. — Source data for Figure 10C, E, F and H. [file elife-55415-fig10-data1.xlsx]

## Sheet: Sheet1
	10C
		Cnt					AGK2					t-test
	CD4	4.75	7.03	7.47	7.98	8.1	8.55	7.96	7.92	6.52	4.54	0.9738
	CD8	11.5	18.3	18.7	18.1	20.6	19.9	20	16.9	17.5	14.6	0.858725
	10E
		Cnt					AGK2					t-test
	CD4	1028	1038	1040	1287	1263	1120	1062	1084	958	1049	0.270784
	CD8	1455	1427	1435	1719	1689	1575	1544	1531	1354	1485	0.551263
	10F			10H
	Cnt	AGK2			No tx	Cnt	AGK2
	73	44.2		Exp 1	5700000	1000000	140000
	78.6	41.9			6000000	900000	10000
	74.4	55.2			16300000	1100000	100000
	68.3	50.8			19000000	3400000	90000
	65.2	38.1			3500000	400000	80000
	t-test	0.000156969		Exp 2	20000000	10000000	200000
					40000000	4000000	500000
					85000000	12000000	800000
					53000000	5000000	700000
						t-test	0.0132031
