# Supplementary material for: Host sirtuin 2 as an immunotherapeutic target against tuberculosis
Source: eLife. 2020 Jul 22;9:e55415. doi: 10.7554/eLife.55415 (PMC7398663; doi:10.7554/eLife.55415)
Supplement: Figure 11—source data 1. — Source data for Figure 11B–D, F, H and I. [file elife-55415-fig11-data1.xlsx]

## Sheet: Sheet1
	11B			11C			11D
	Cnt	AGK2		Cnt	AGK2		Cnt	AGK2
	400000	80000		22000	3000		25000	2000
	420000	50000		21000	2000		26000	4000
	300000	70000		31000	5000		20000	5000
	350000	90000		20000	4000		16000	3000
	250000	14000		15000	10000		30000	13000
	t-test	3.37249e-05		t-test	0.000419199		t-test	0.000431943
	11F					11H			11I
	Cnt	AGK2	INH	Both		Cnt	AGK2		Cnt	AGK2
	330000	30000	10000	1000		490000	220000		530000	320000
	240000	20000	15000	4000		450000	230000		800000	210000
	160000	80000	18000	3000		700000	240000		1100000	190000
	200000	100000	35000	10000		900000	270000		1300000	270000
	180000	90000	22000	6000		800000	230000		900000	180000
			t-test	0.0096615		t-test	0.00116852		t-test	0.00084808
